# Supplementary material for: A combustion synthesis route for magnetically separable graphene oxide–CuFe2O4–ZnO nanocomposites with enhanced solar light-mediated photocatalytic activity
Source: Royal Society of Chemistry journal article supplement (doi:10.1039/c7nj02070h), 2017-01-01
Supplement: c7nj02070h1.pdf [file c7nj02070h1.pdf]

## Supporting Information

### **A Combustion Synthesis Route for Magnetically Separable Graphene Oxide-CuFe<sub>2</sub>O<sub>4</sub>-ZnO Nanocomposite with Enhanced Solar Light-Mediated Photocatalytic Activity**

Aniket Kumar, Lipeeka Rout, L. Satish K. Achary, Sangram Keshari Mohanty and Priyabrat Dash \*

Department of Chemistry, National Institute of Technology, Rourkela, Odisha, India, 769008

#### **Preparation of graphene oxide–CuFe<sub>2</sub>O<sub>4</sub> nanocomposite (GC)**

The Graphene oxide-CuFe<sub>2</sub>O<sub>4</sub> (GC) were synthesized by a one- step combustion method, using nitrates (Cu (NO<sub>3</sub>)<sub>2</sub>. 6H<sub>2</sub>O and Fe (NO<sub>3</sub>)<sub>3</sub>. 9H<sub>2</sub>O) and citric acid as oxidizer and fuel, respectively. First, required amounts of GO, nitrates and citric acid were added to deionized water (50 mL), followed by 30 min of ultrasonic treatment. Mole ratios of both Fe/Cu and glucose/nitrates were 2:1. Then, the solution was placed on an electric jacket at a temperature of 300 °C to remove the solvent, until combustion reaction took place and a black and fine GC was obtained.

#### **Preparation of graphene oxide–ZnO nanocomposite (GZ)**

The Graphene oxide-ZnO (GZ) were synthesized by a one- step combustion method, using zinc nitrates (Zn (NO<sub>3</sub>)<sub>2</sub>. 6H<sub>2</sub>O) and citric acid as oxidizer and fuel, respectively. First, required amounts of GO, nitrates and citric acid were added to deionized water (50 mL), followed by 30 min of ultrasonic treatment. Then, the solution was placed on an electric jacket at a temperature of 300 °C to remove the solvent, until combustion reaction took place and a black, loose GZ was obtained.

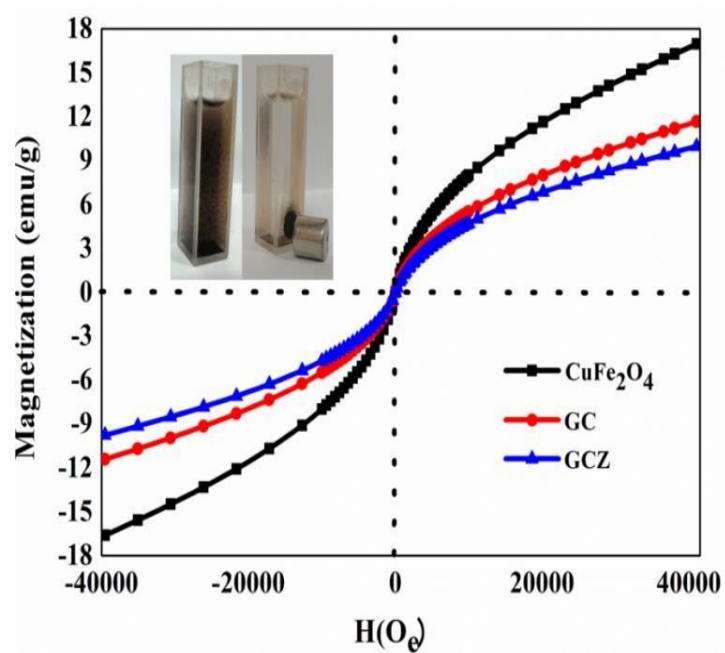

**Fig. S1.** Hysteresis loops of pure  $\text{CuFe}_2\text{O}_4$ , GC and GCZ. The inset is the magnetic separation property of GCZ nanocomposite.

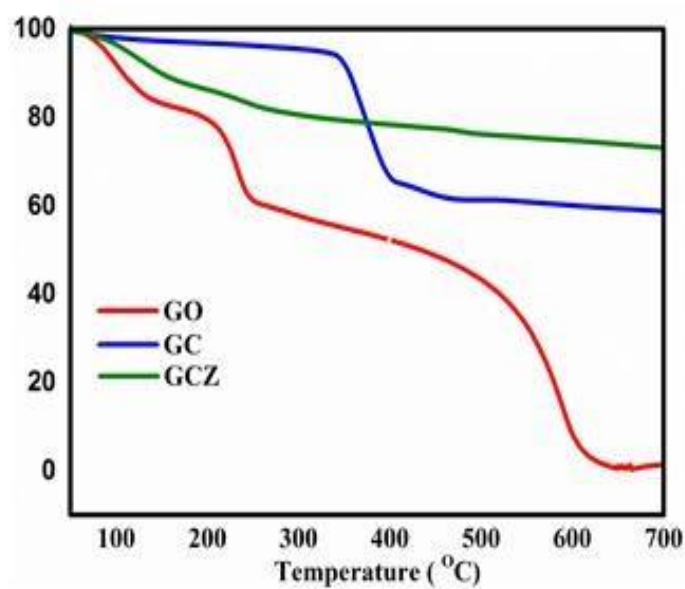

**Fig. S2.** TGA curve of GO, GC and GCZ nanocomposite.

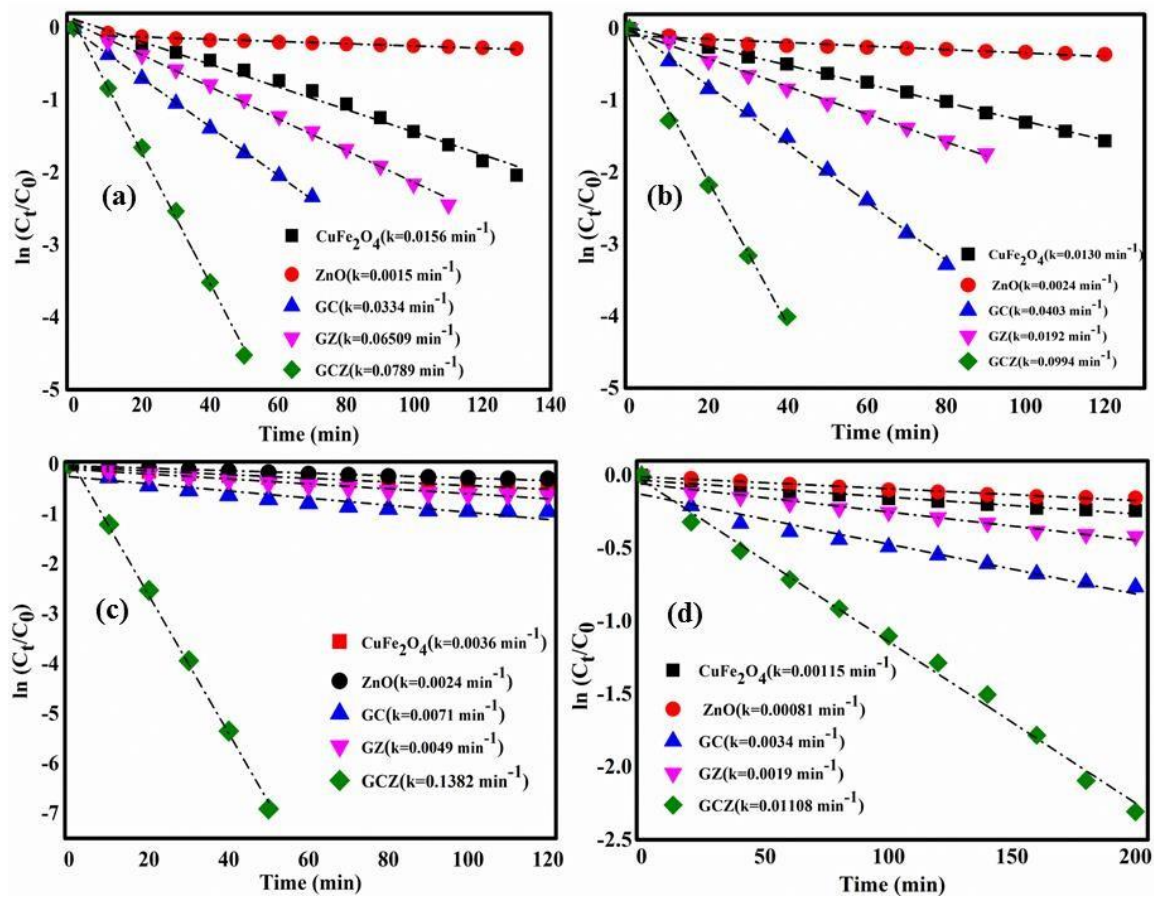

**Fig. S3.** Kinetics plot for the degradation of a) RhB, b) MB, c) MO and d) Phenol organic pollutant using different nanocomposite under sunlight.

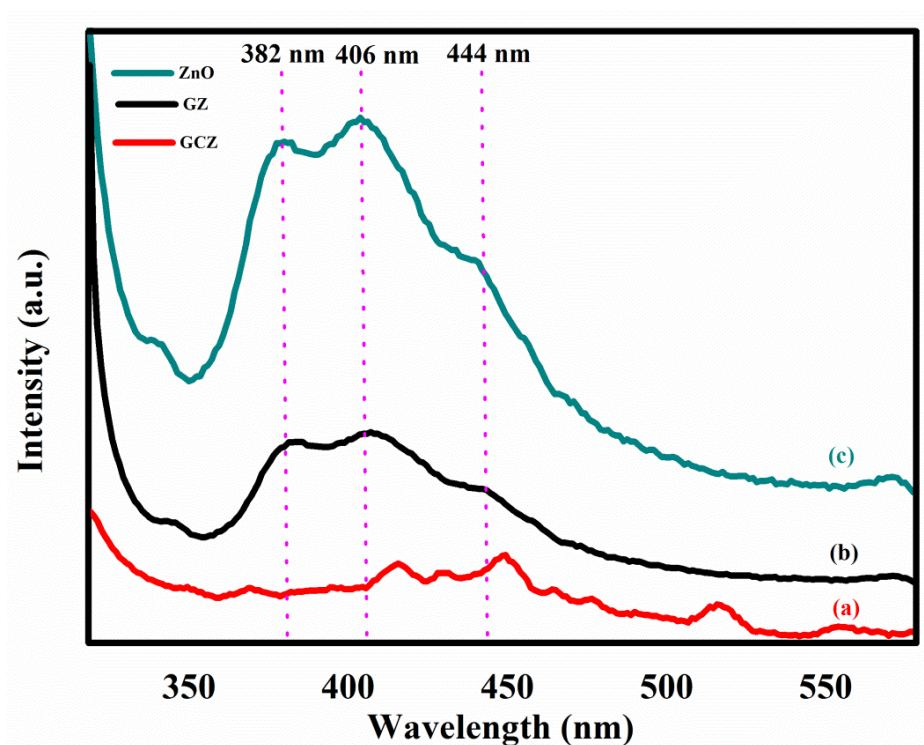

**Fig. S4.** Photoluminescence spectra of synthesized a) GCZ, b) GZ, and c) ZnO nanocomposite.

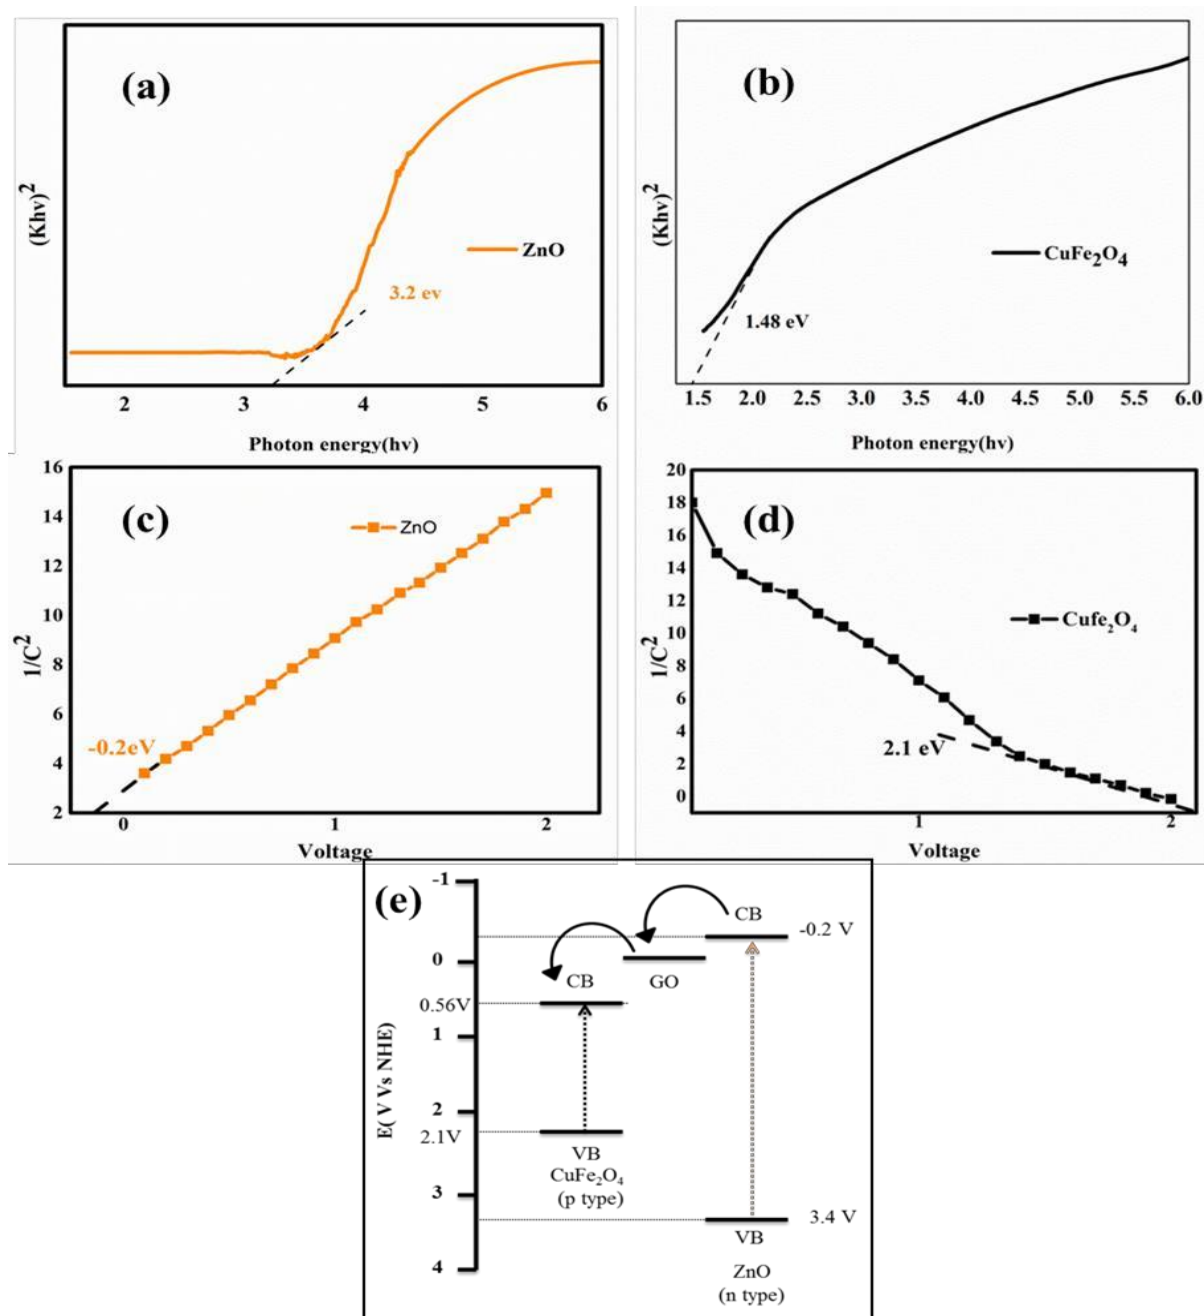

**Fig. S5.** Mott-Schottky plots of (a) ZnO and (b) CuFe<sub>2</sub>O<sub>4</sub> (the measurements were carried out in 0.1 M Na<sub>2</sub>SO<sub>4</sub> at pH ~ 6. Tauc plots of (c) ZnO and (d) CuFe<sub>2</sub>O<sub>4</sub>, and (e) Schematics of the potential energy diagram for the CuFe<sub>2</sub>O<sub>4</sub>-ZnO heterojunction.

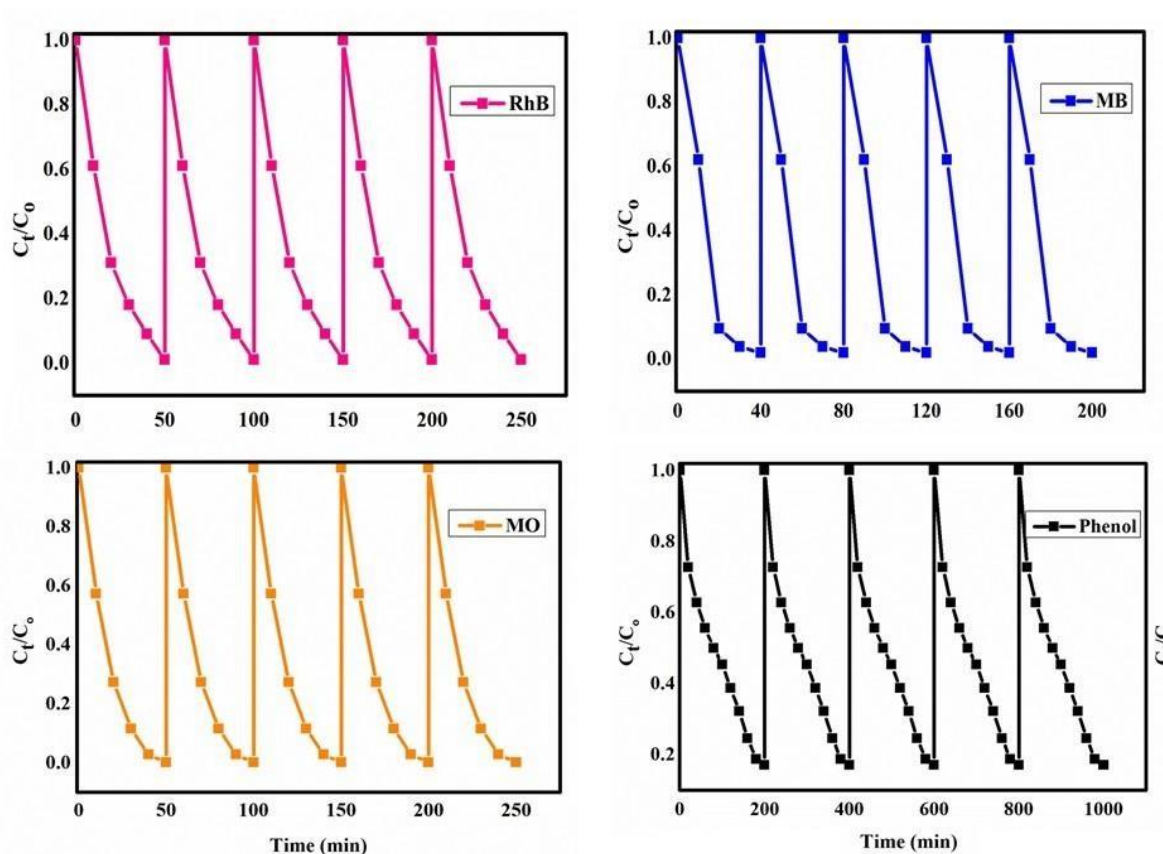

**Fig. S6.** Recyclability of GCZ nanocomposite in five successive experiments for photocatalytic degradation of RhB, MB, MO and Phenol as organic pollutant in aqueous media under sunlight irradiation.

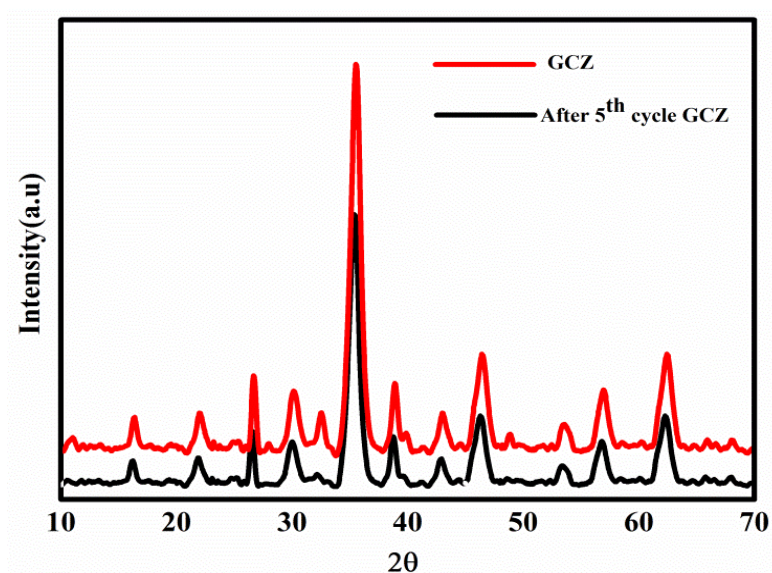

**Fig. S7.** XRD patterns of GCZ nanocomposite before and after the photocatalysis.

**Table.S1.** Degradation percentages of dye obtained by different photocatalysts reported in literature.

| Photocatalyst                                             | Dyes              | Concentration<br>(mg L <sup>-1</sup> ) | Irradiated source | Volume/catalyst<br>ml : mg | % degradation :<br>time               | References   |
|-----------------------------------------------------------|-------------------|----------------------------------------|-------------------|----------------------------|---------------------------------------|--------------|
| Graphene–TiO <sub>2</sub> –Fe <sub>3</sub> O <sub>4</sub> | RhB               | 5mgL <sup>-1</sup>                     | 300 W Hg lamp     | 50ml/10mg                  | 100/25 min                            | 100          |
| Graphene–CoFe <sub>2</sub> O <sub>4</sub> –CdS            | MB                | 20mg/L                                 | 40 W lamp         | 100ml/25 mg                | 80/180 min                            | 101          |
| P25/CoFe <sub>2</sub> O <sub>4</sub> /graphene            | MB                | 40mg/L                                 | 500 W Xenon lamp  | 30 ml/30 mg                | 100/240 min                           | 102          |
| GO–SnO <sub>2</sub> –TiO <sub>2</sub>                     | MB,CR             | 20 mg/L                                | Sunlight          | 50 mL/ 10 mg               | 96 / 60min                            | 42           |
| Graphene-TiO <sub>2</sub> -ZnO                            | Phenol            | 40mg/L                                 | 1000 W Xenon      | 100<br>mL//125mg           | 98 / 70min                            | 103          |
| rGO -TiO <sub>2</sub> -CdS                                | RhB,<br>MB        | 20 mg/L                                | 500 W Xenon lamp  | 80mL/50 mg                 | 87.5/ 20 min<br>97.5/20 min           | 64           |
| TiO <sub>2</sub> /Cu <sub>2</sub> O/rGO                   | MB                | 25 mg/L                                | Sunlight          | 100mL/ 80 mg               | 100 / 300 min                         | 104          |
| rGO/SnS <sub>2</sub> /ZnFe <sub>2</sub> O <sub>4</sub>    | P-Nitro<br>Phenol | 10 mg/L                                | 300 W xenon lamp  | 100ml/100 mg               | 100/ 120 min                          | 105          |
| GO-CuFe <sub>2</sub> O <sub>4</sub> -ZnO                  | RhB,<br>MB,<br>MO | 40mg/L                                 | Sunlight          | 50 mL/ 10 mg               | 100/50 min<br>100/40 min<br>98/50 min | Present work |
| GO-CuFe <sub>2</sub> O <sub>4</sub> -ZnO                  | Phenol            | 50mg/L                                 | Sunlight          | 50 mL/ 10 mg               | 88/180 min                            | Present Work |
